# Supplementary material for: Kinetics of the valorization of hexoses with Sn-USY catalysts in methanolic media: glycosidation vs. retroaldol cleavage
Source: Royal Society of Chemistry journal article supplement (doi:10.1039/d4re00307a), 2024-10-09
Supplement: d4re00307a1.pdf [file d4re00307a1.pdf]

## Supplementary information

### **Kinetics on the valorization of hexoses with Sn-USY catalysts in methanolic media: glycosidation vs retroaldol cleavage.**

J.M. Jiménez Martín<sup>1</sup>, M. El Tawil-Lucas<sup>1</sup>, C. García-Jerez<sup>1</sup>, J. Moreno<sup>1</sup>, A. García<sup>1</sup>, B. Hernández<sup>1</sup>, J. Iglesias<sup>1,2,\*</sup>

<sup>1</sup> Chemical & Environmental Engineering Group. Universidad Rey Juan Carlos. C/ Tulipán s/n. Móstoles. 28933. Madrid. Spain.

<sup>2</sup> Instituto de Tecnologías para la Sostenibilidad. Universidad Rey Juan Carlos. C/ Tulipán s/n. Móstoles. 28933. Madrid. Spain.

\*Corresponding author email: [jose.iglesias@urjc.es](mailto:jose.iglesias@urjc.es)

#### **INDEX**

S-1: Validation of the model for case studies with different temperatures, a catalyst load of 10 g/L and glucose as substrate.

S-2: Validation of the model for case studies with different temperatures, a catalyst load of 10 g/L and fructose as substrate.

S-3: Validation of the model for case studies with different temperatures, a catalyst load of 10 g/L and mannose as substrate.

S-4: Validation of the model for case studies with different catalyst load with glucose as substrate at 140 °C.

S-5: Validation of the model for case studies with different catalyst load with fructose as substrate at 140 °C.

S-6: Validation of the model for case studies with different catalyst load with mannose as substrate at 140 °C.

Number of pages: 19

Number of figures: 18

**S-1: Validation of the model for case studies with different temperatures, a catalyst load of 10 g/L and glucose as substrate**

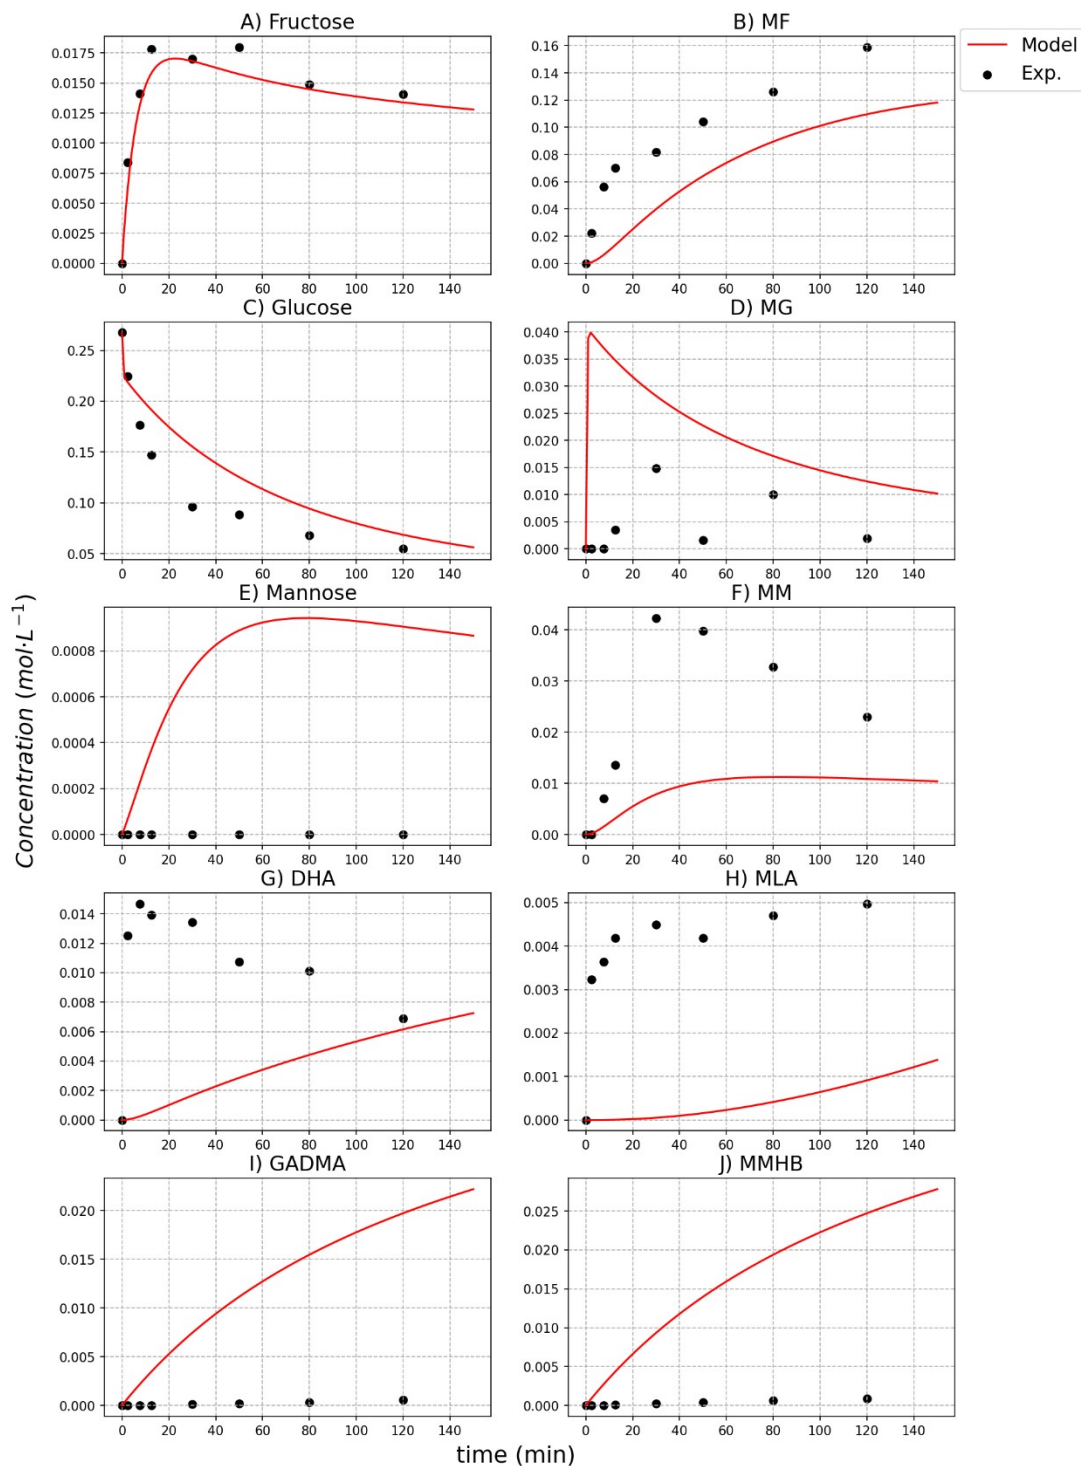

**Figure S-1.** Validation of the kinetic model at 100 °C when glucose is fed as substrate. The concentration is presented for the following components: A) Fructose, B) Methyl Fructoside (MFP), C) Glucose, D) Methyl Glucoside (MGP), E) Mannose, F) Methyl Mannoside (MMP), G) dihydroxyacetone (DHA), H) Methyl lactate (MLa), I) glycolaldehyde dimethyl acetal (GADMA) and J) methyl 2-hydroxy-4-methoxybutanoate (MMHB).

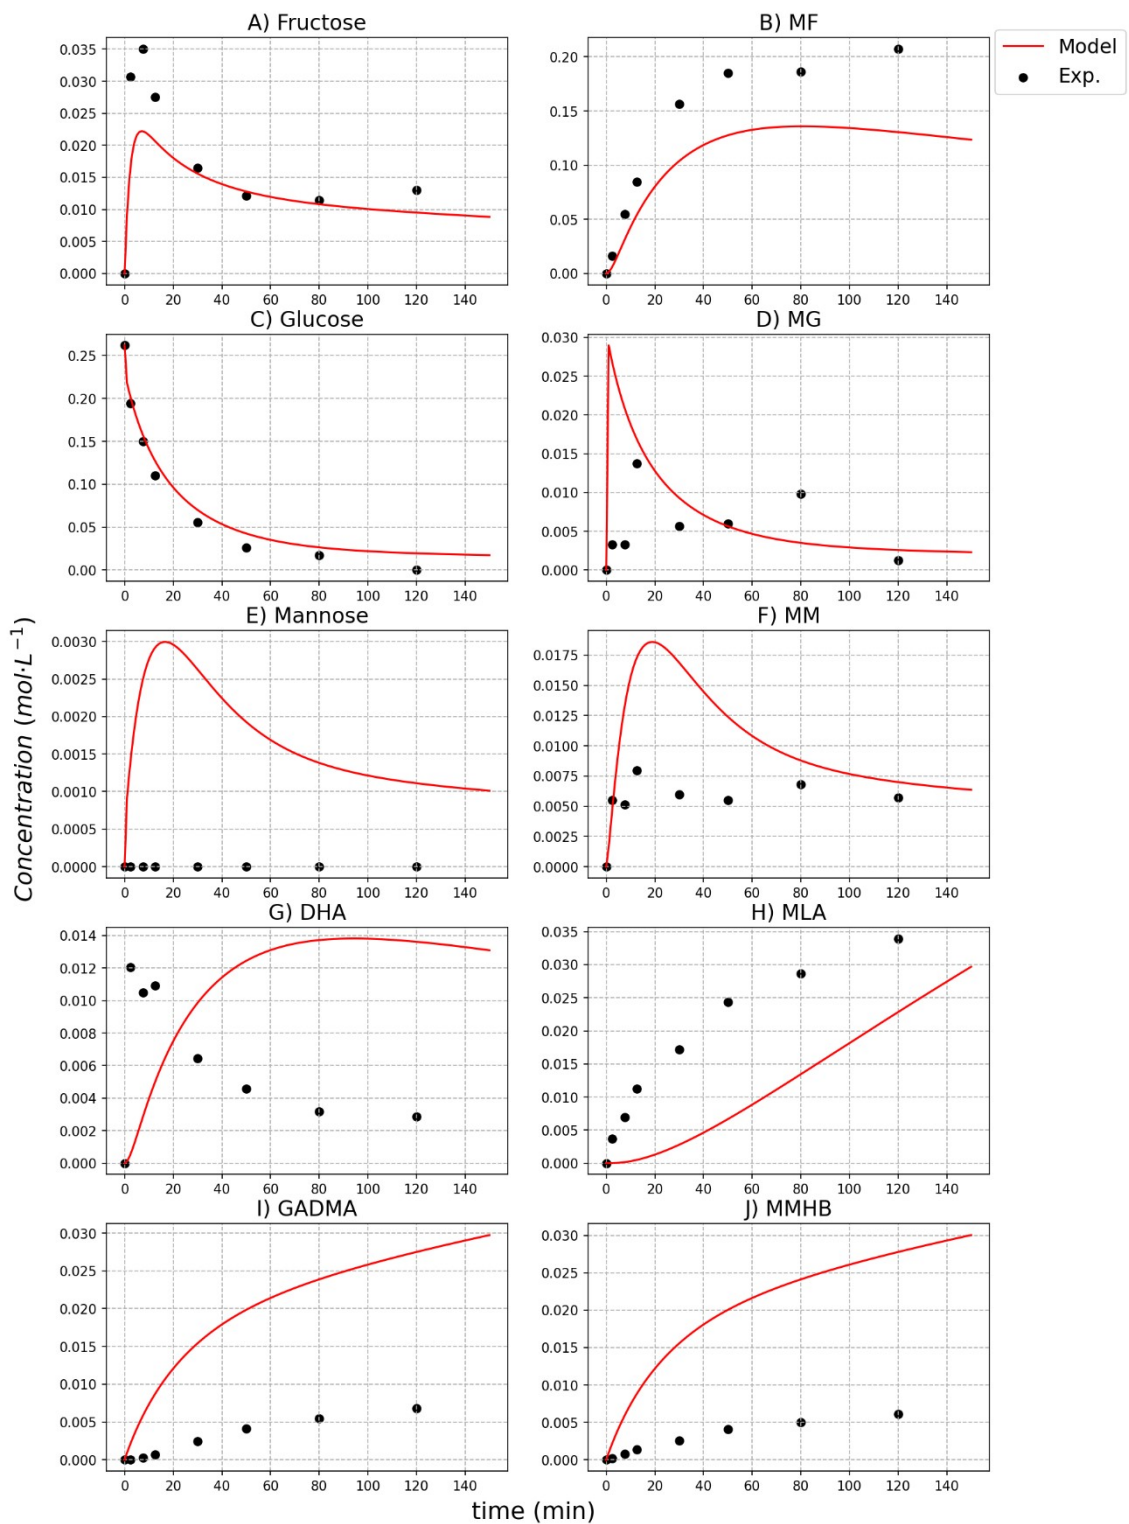

**Figure S-2.** Validation of the kinetic model at 120 °C when glucose is fed as substrate. The concentration is presented for the following components: A) Fructose, B) MFP, C) Glucose, D) MGP, E) Mannose, F) MMP, G) DHA, H) MLa, I) GADMA and J) MMHB.

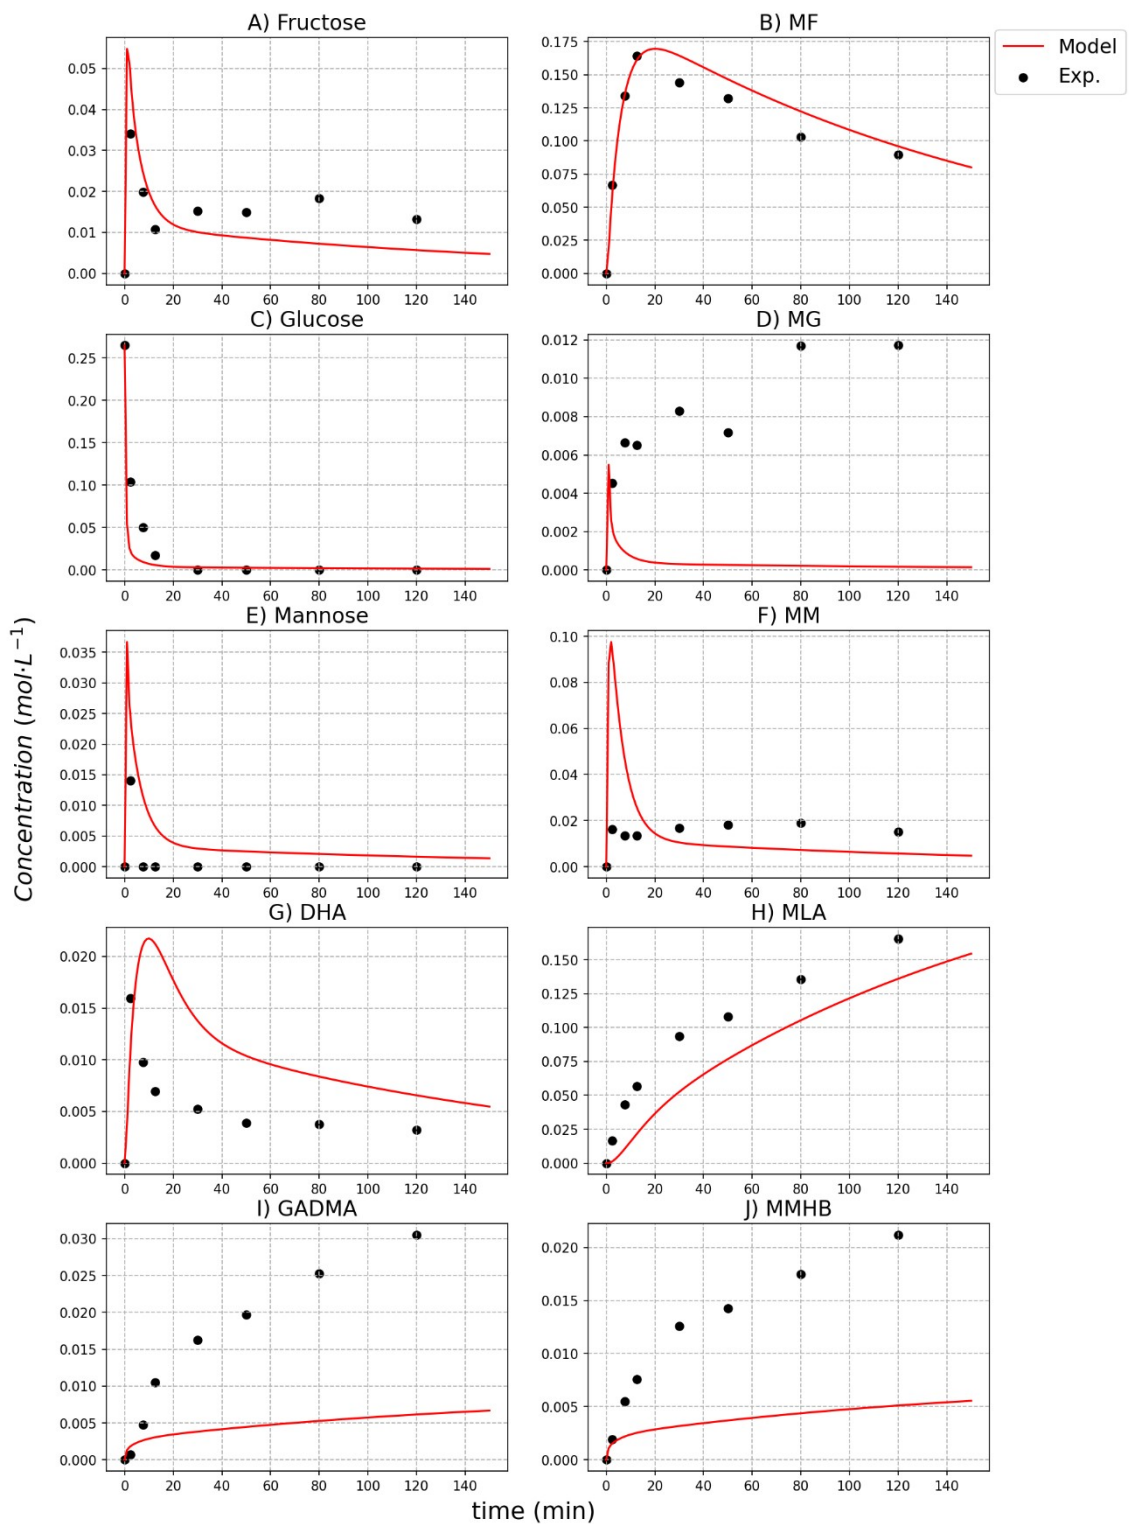

**Figure S-3.** Validation of the kinetic model at 140 °C when glucose is fed as substrate. The concentration is presented for the following components: A) Fructose, B) MFP, C) Glucose, D) MGP, E) Mannose, F) MMP, G) DHA, H) MLa, I) GADMA and J) MMHB.

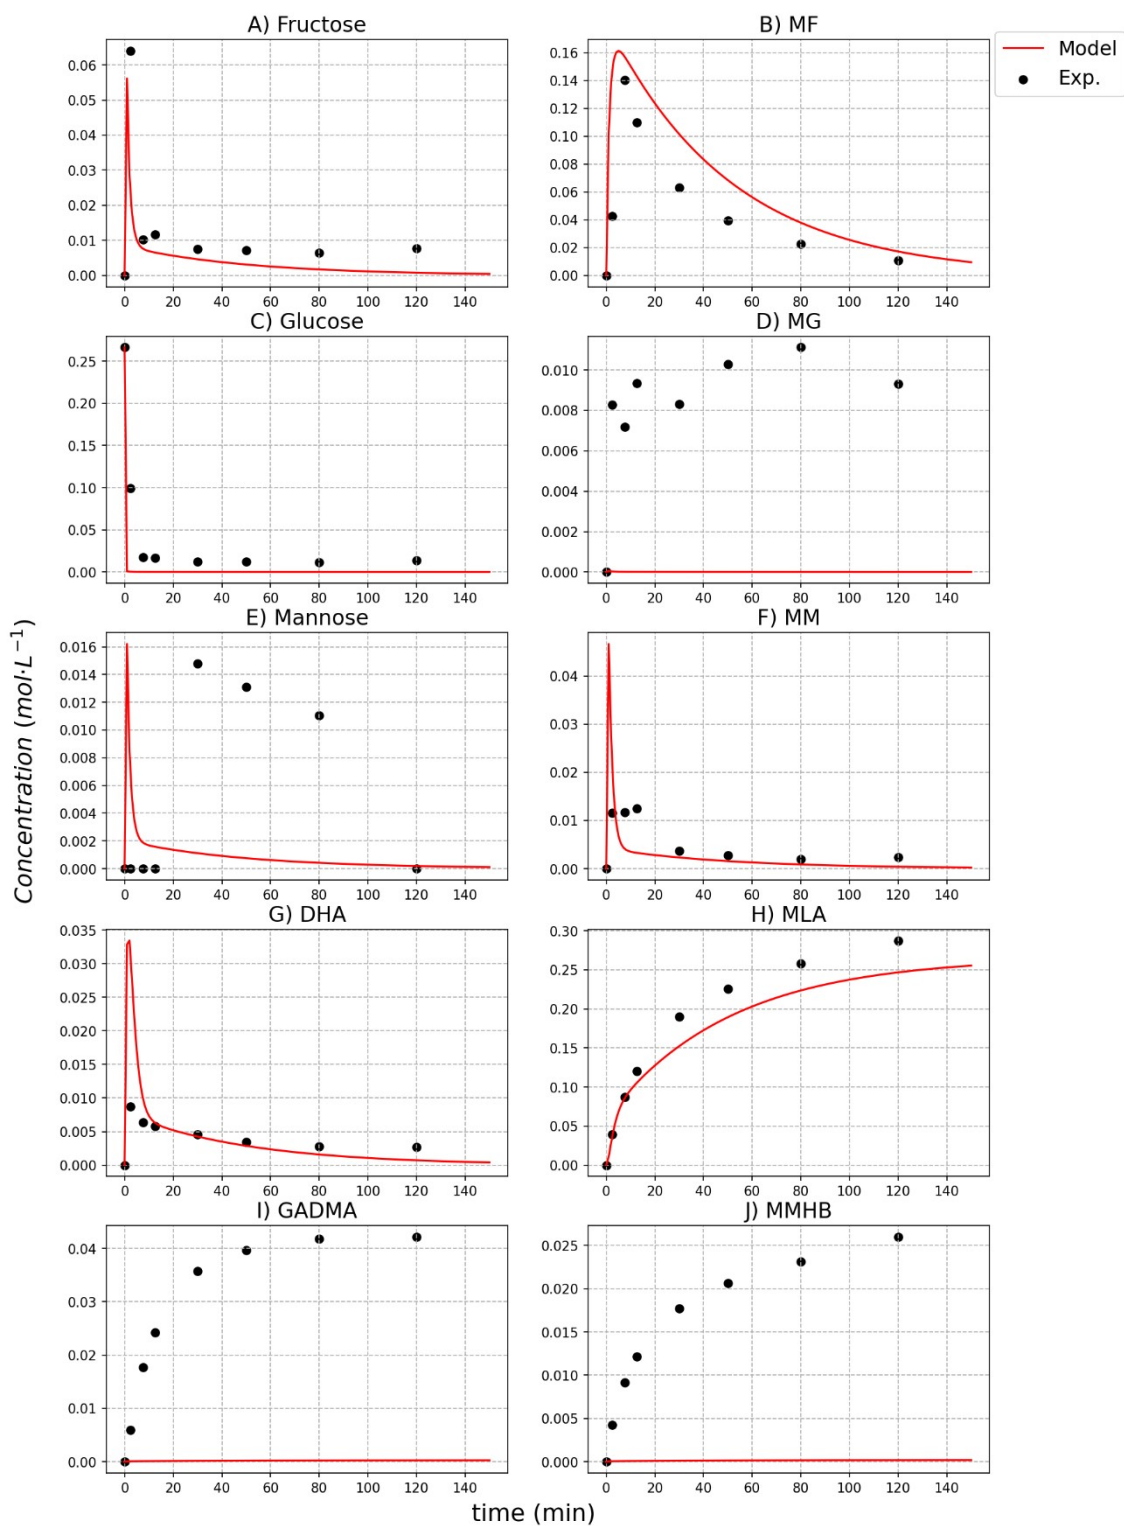

**Figure S-4.** Validation of the kinetic model at 160 °C when glucose is fed as substrate. The concentration is presented for the following components: A) Fructose, B) MFP, C) Glucose, D) MGP, E) Mannose, F) MMP, G) DHA, H) MLa, I) GADMA and J) MMHB.

**S-2: Validation of the model for case studies with different temperatures, a catalyst load of 10 g/L and fructose as substrate**

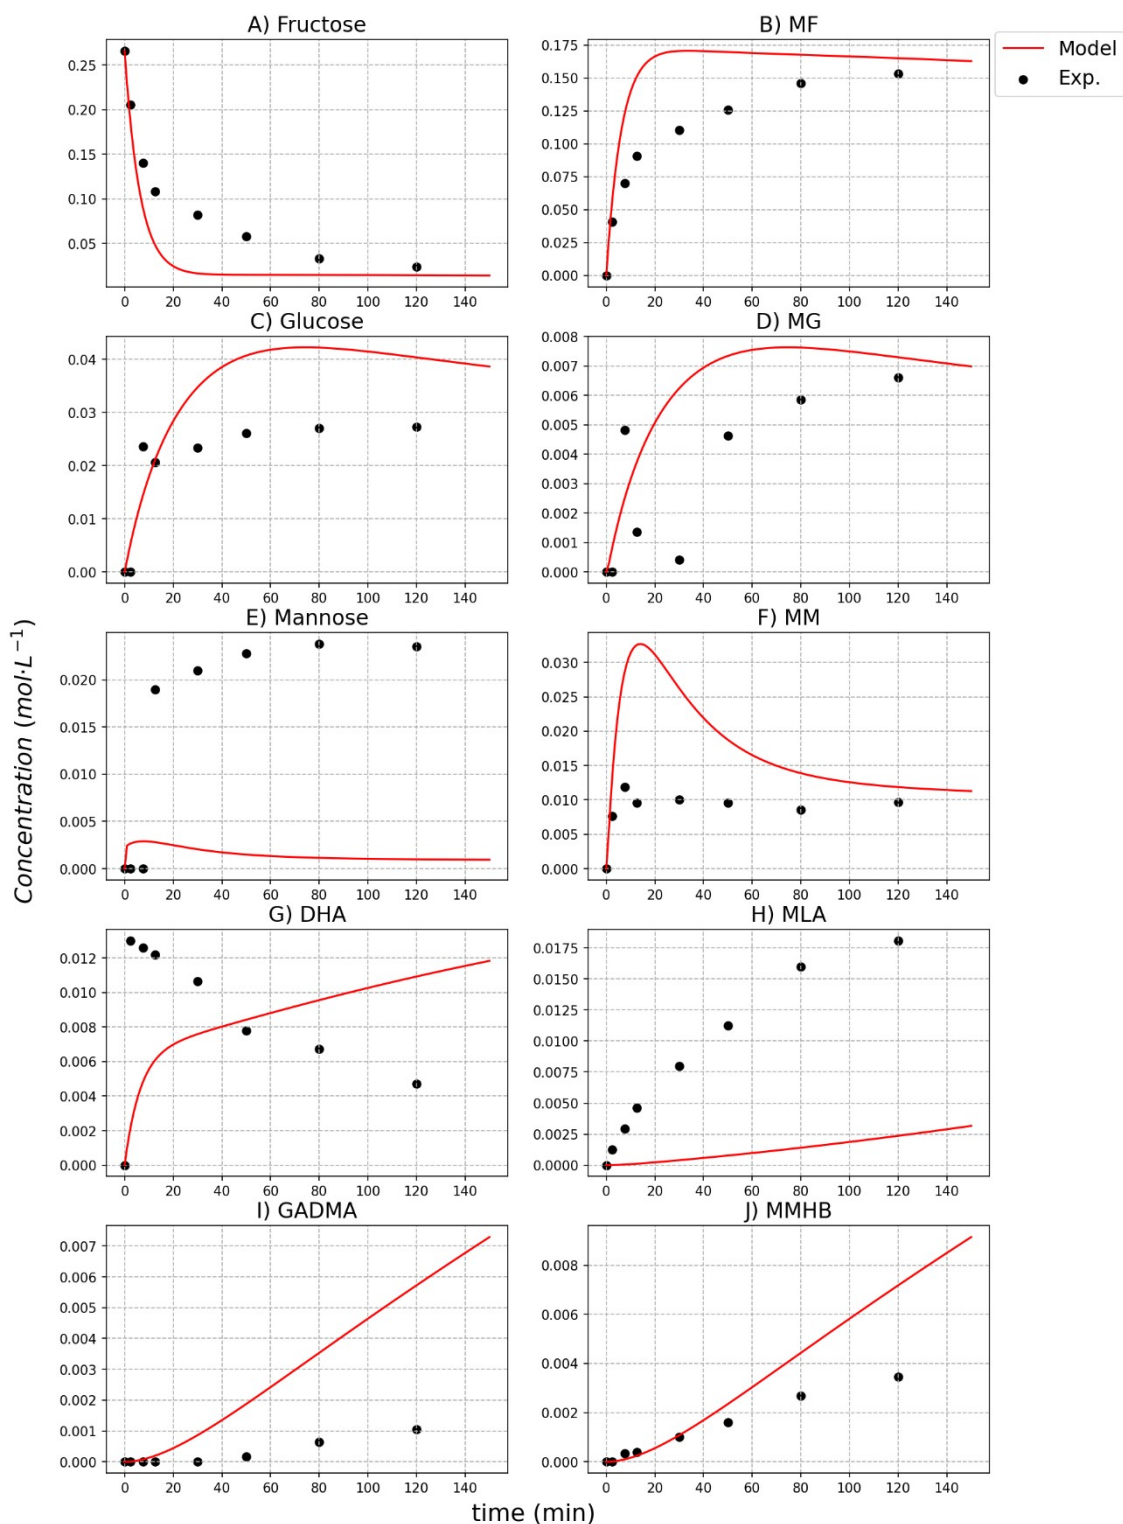

**Figure S-5.** Validation of the kinetic model at 100 °C when fructose is fed as substrate. The concentration is presented for the following components: A) Fructose, B) MFP, C) Glucose, D) MGP, E) Mannose, F) MMP, G) DHA, H) MLa, I) GADMA and J) MMHB.

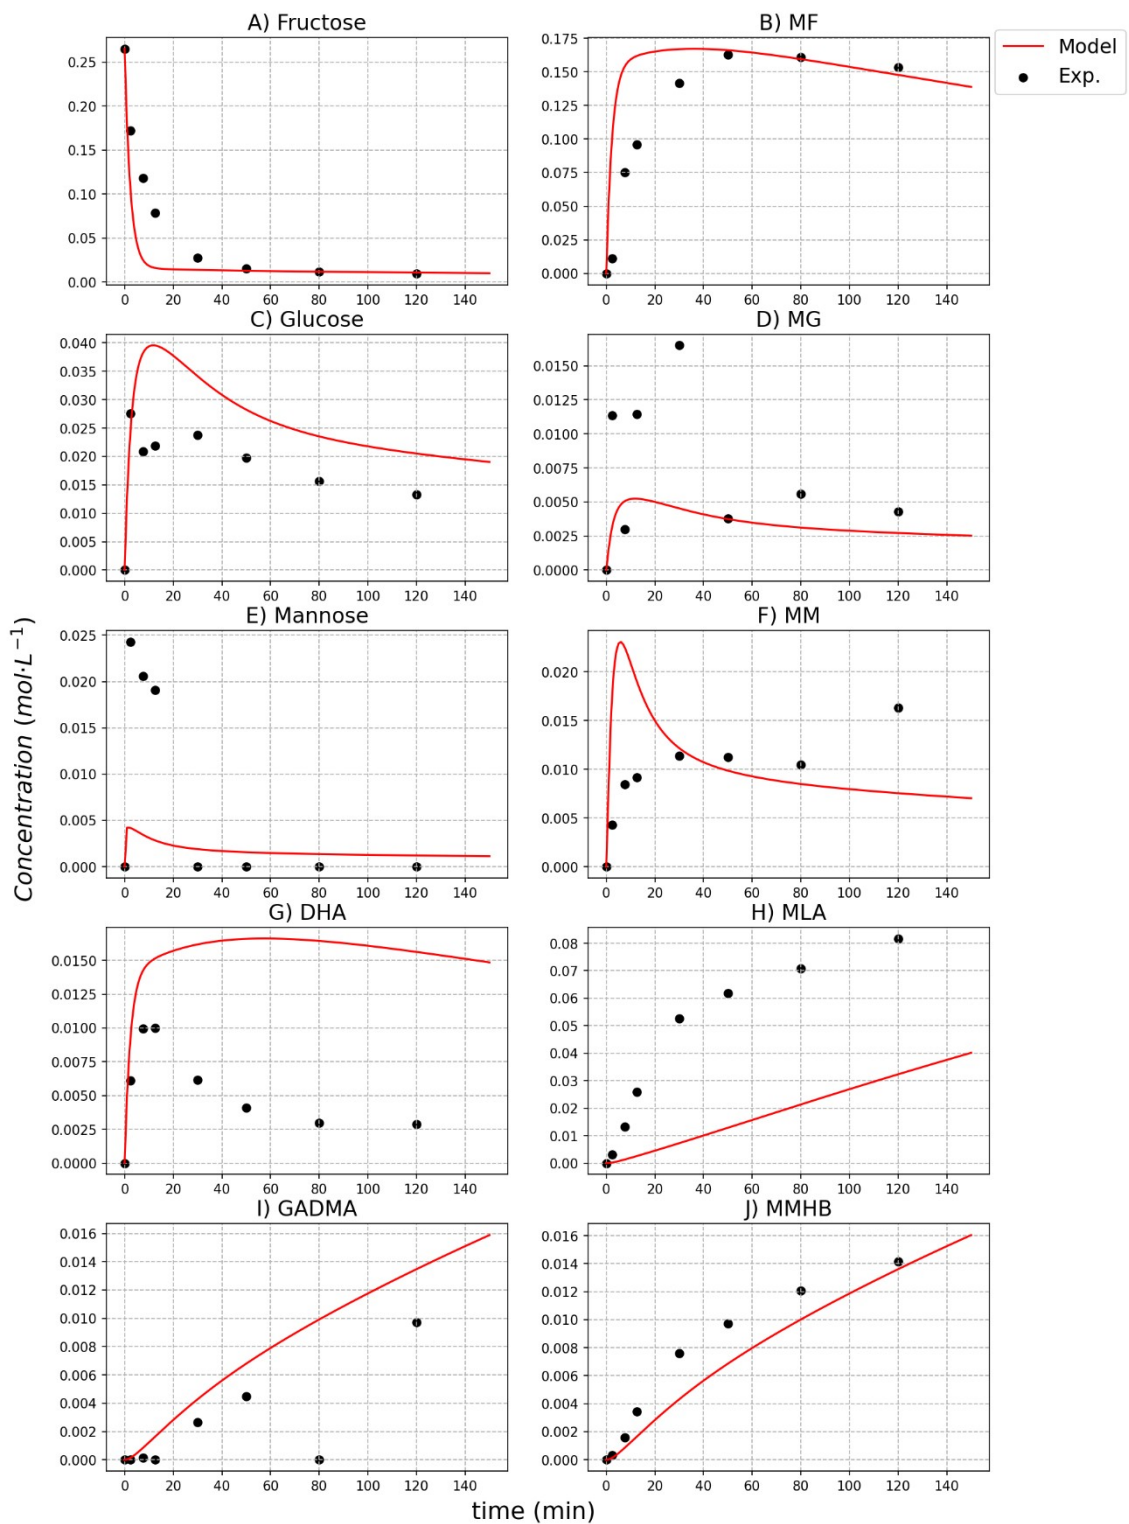

**Figure S-6.** Validation of the kinetic model at 120 °C when fructose is fed as substrate. The concentration is presented for the following components: A) Fructose, B) MFP, C) Glucose, D) MGP, E) Mannose, F) MMP, G) DHA, H) MLa, I) GADMA and J) MMHB.

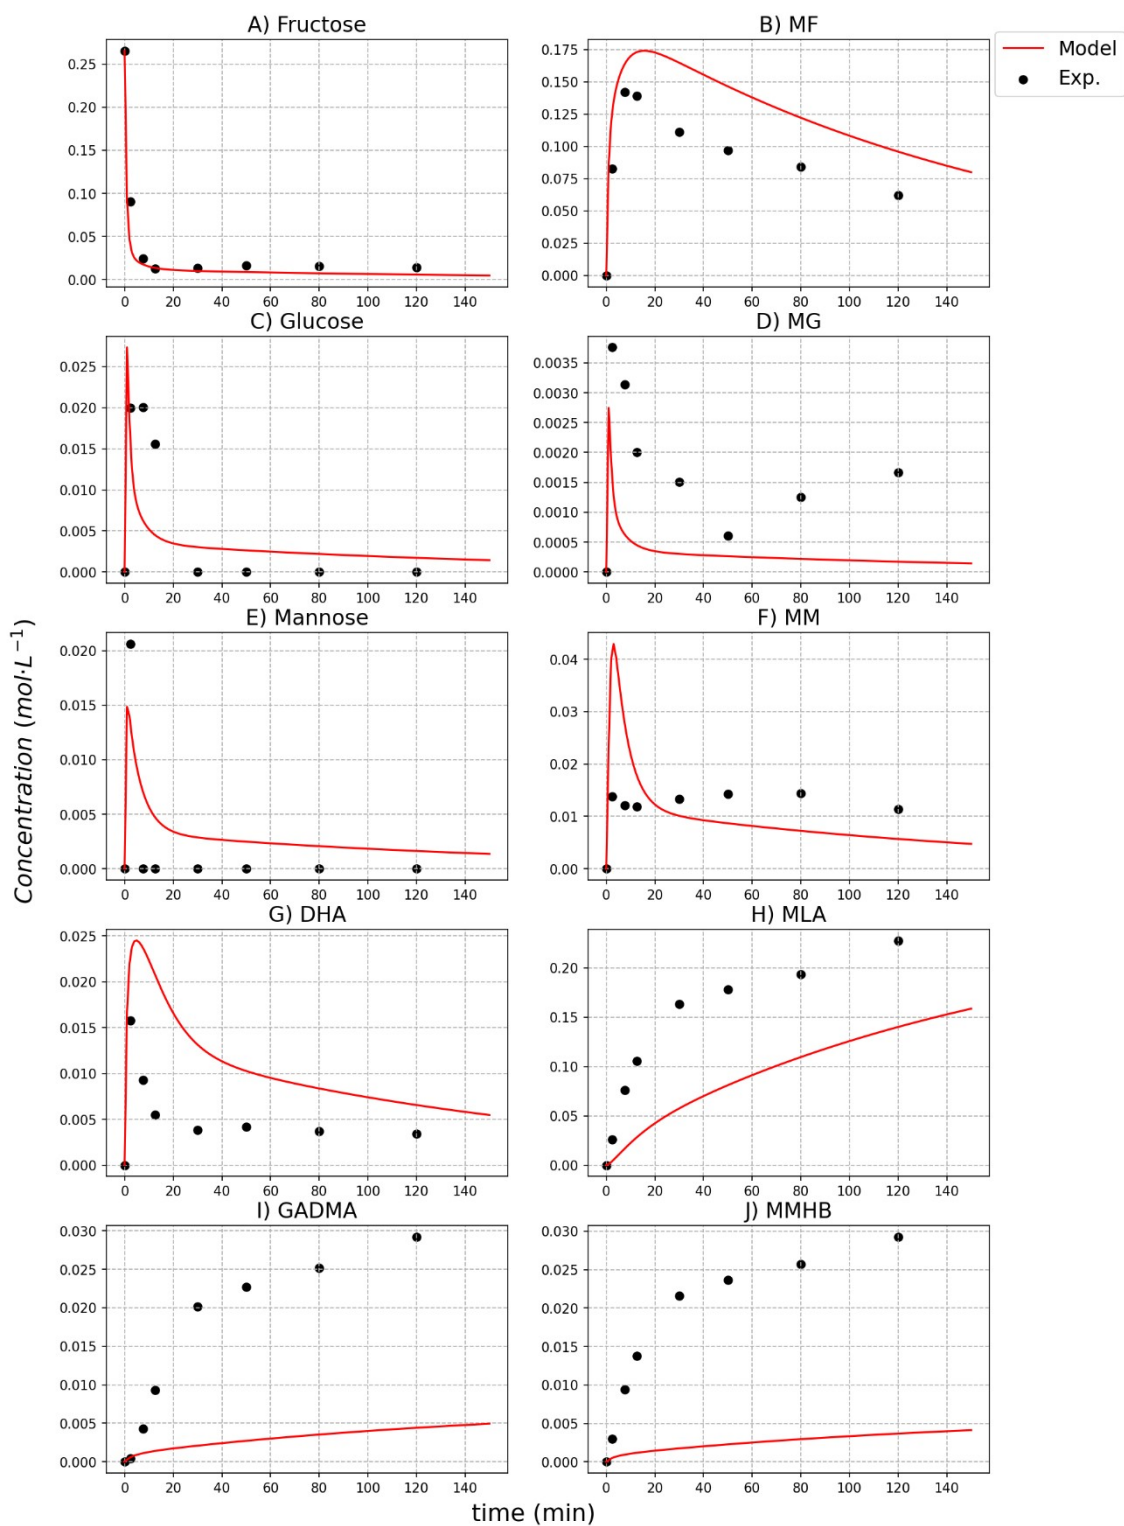

**Figure S-7.** Validation of the kinetic model at 140 °C when fructose is fed as substrate. The concentration is presented for the following components: A) Fructose, B) MFP, C) Glucose, D) MGP, E) Mannose, F) MMP, G) DHA, H) MLa, I) GADMA and J) MMHB.



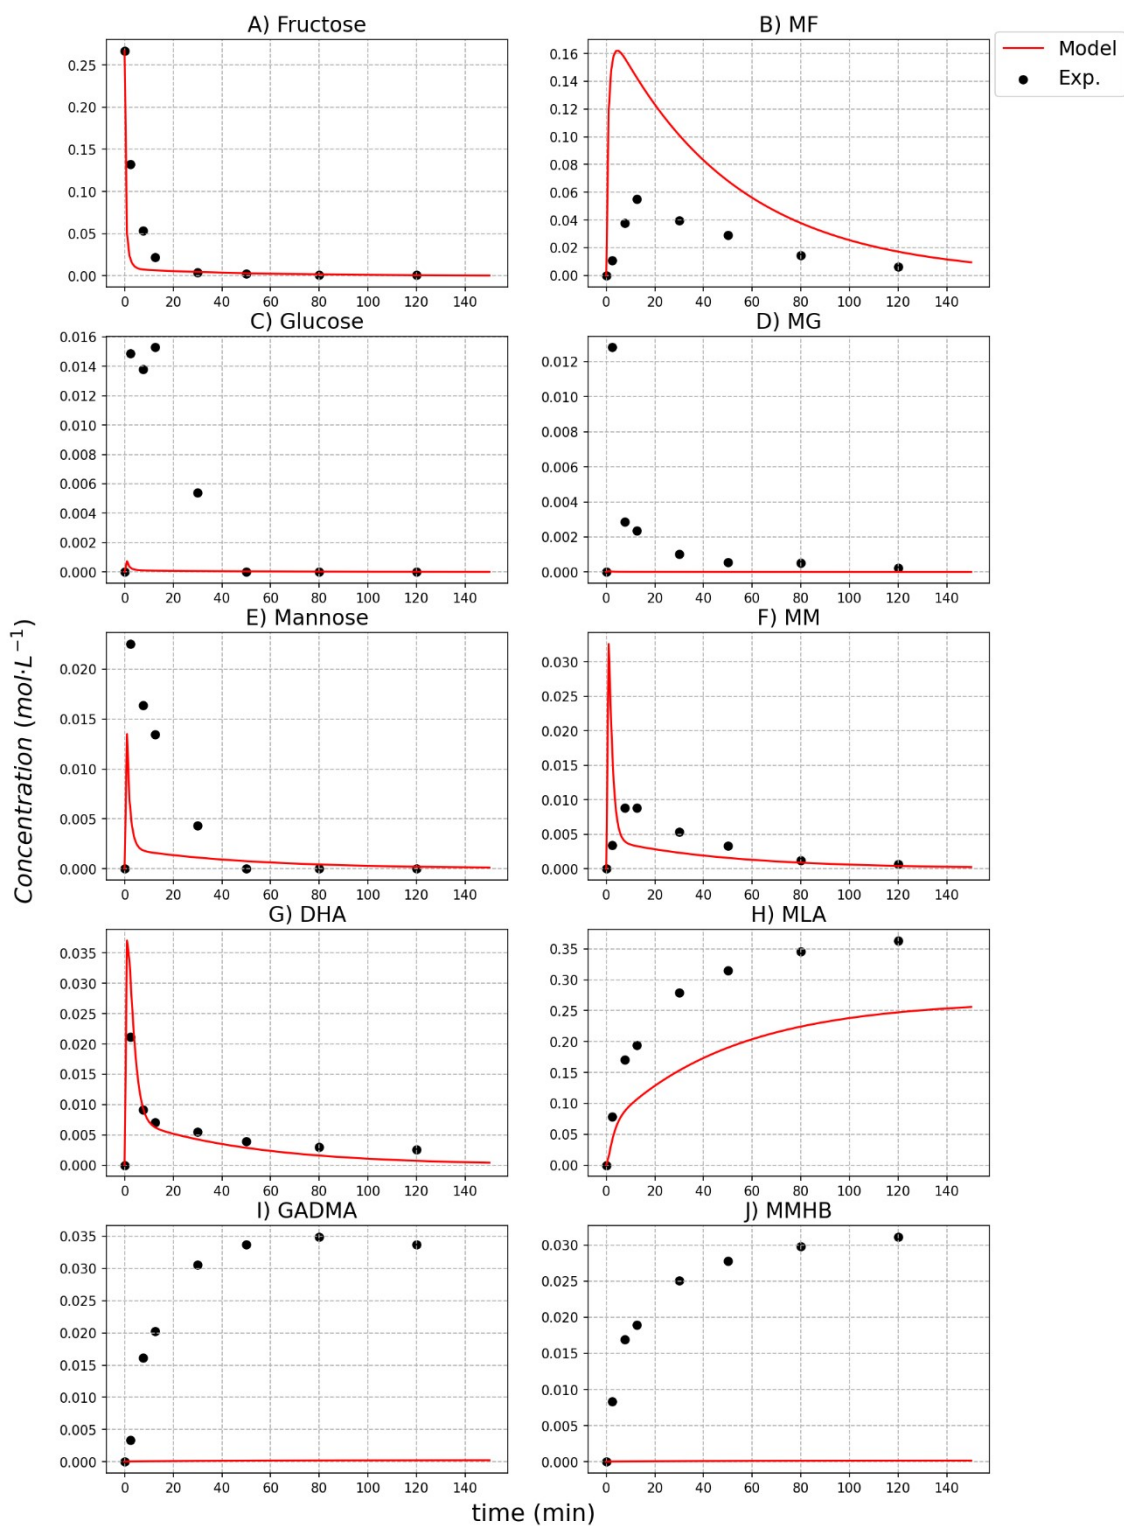

**Figure S-8.** Validation of the kinetic model at 160 °C when fructose is fed as substrate. The concentration is presented for the following components: A) Fructose, B) MFP, C) Glucose, D) MGP, E) Mannose, F) MMP, G) DHA, H) MLa, I) GADMA and J) MMHB.

**S-3: Validation of the model for case studies with different temperatures, a catalyst load of 10 g/L and fructose as substrate**

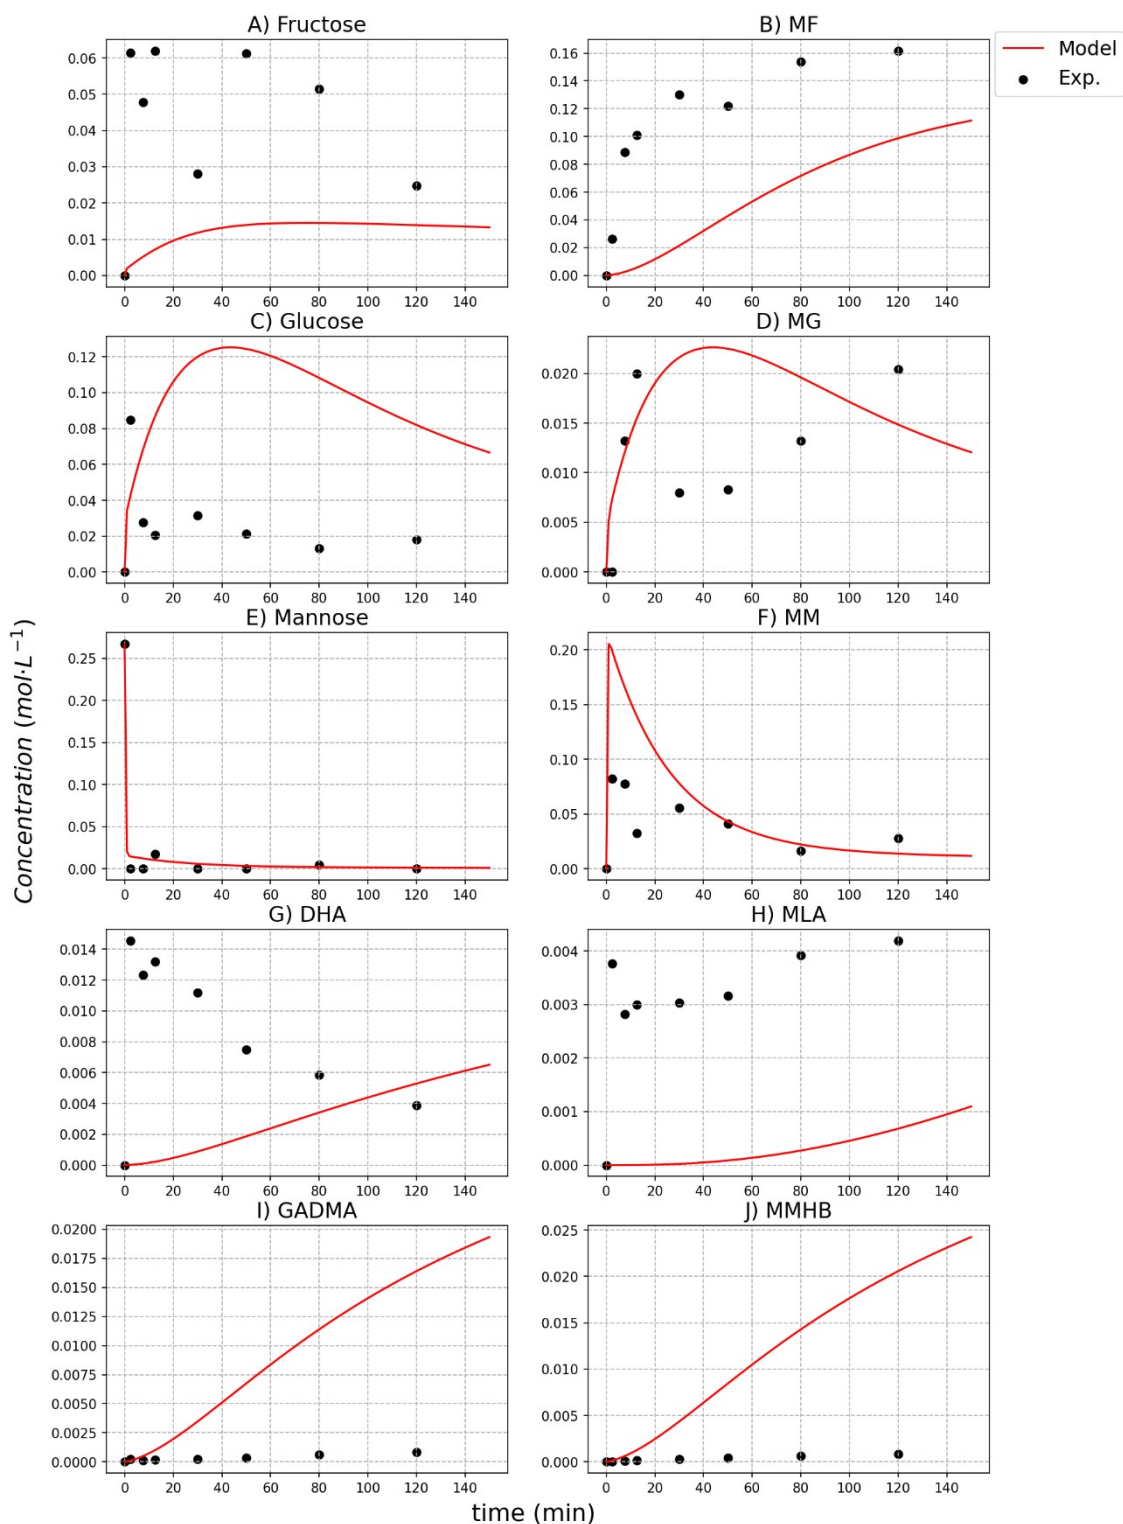

**Figure S-9.** Validation of the kinetic model at 100 °C when mannose is fed as substrate. The concentration is presented for the following components: A) Fructose, B) MFP, C) Glucose, D) MGP, E) Mannose, F) MMP, G) DHA, H) MLa, I) GADMA and J) MMHB.

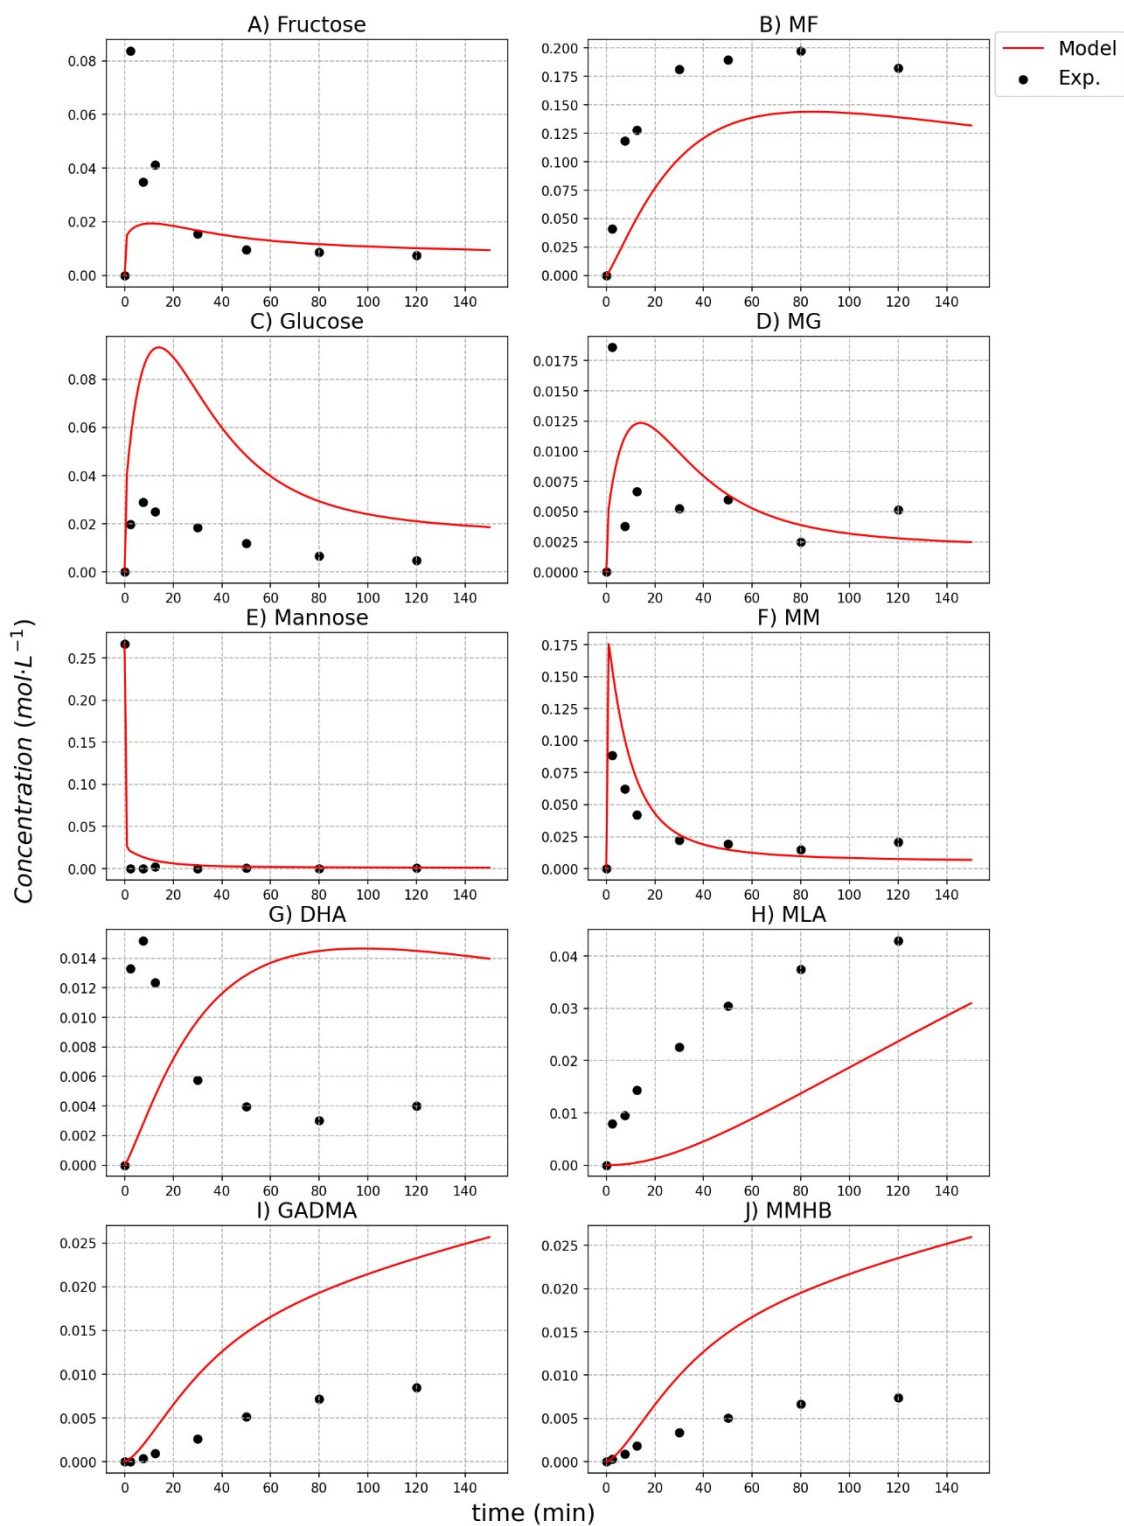

**Figure S-10.** Validation of the kinetic model at 120 °C when mannose is fed as substrate. The concentration is presented for the following components: A) Fructose, B) MFP, C) Glucose, D) MGP, E) Mannose, F) MMP, G) DHA, H) MLa, I) GADMA and J) MMHB.

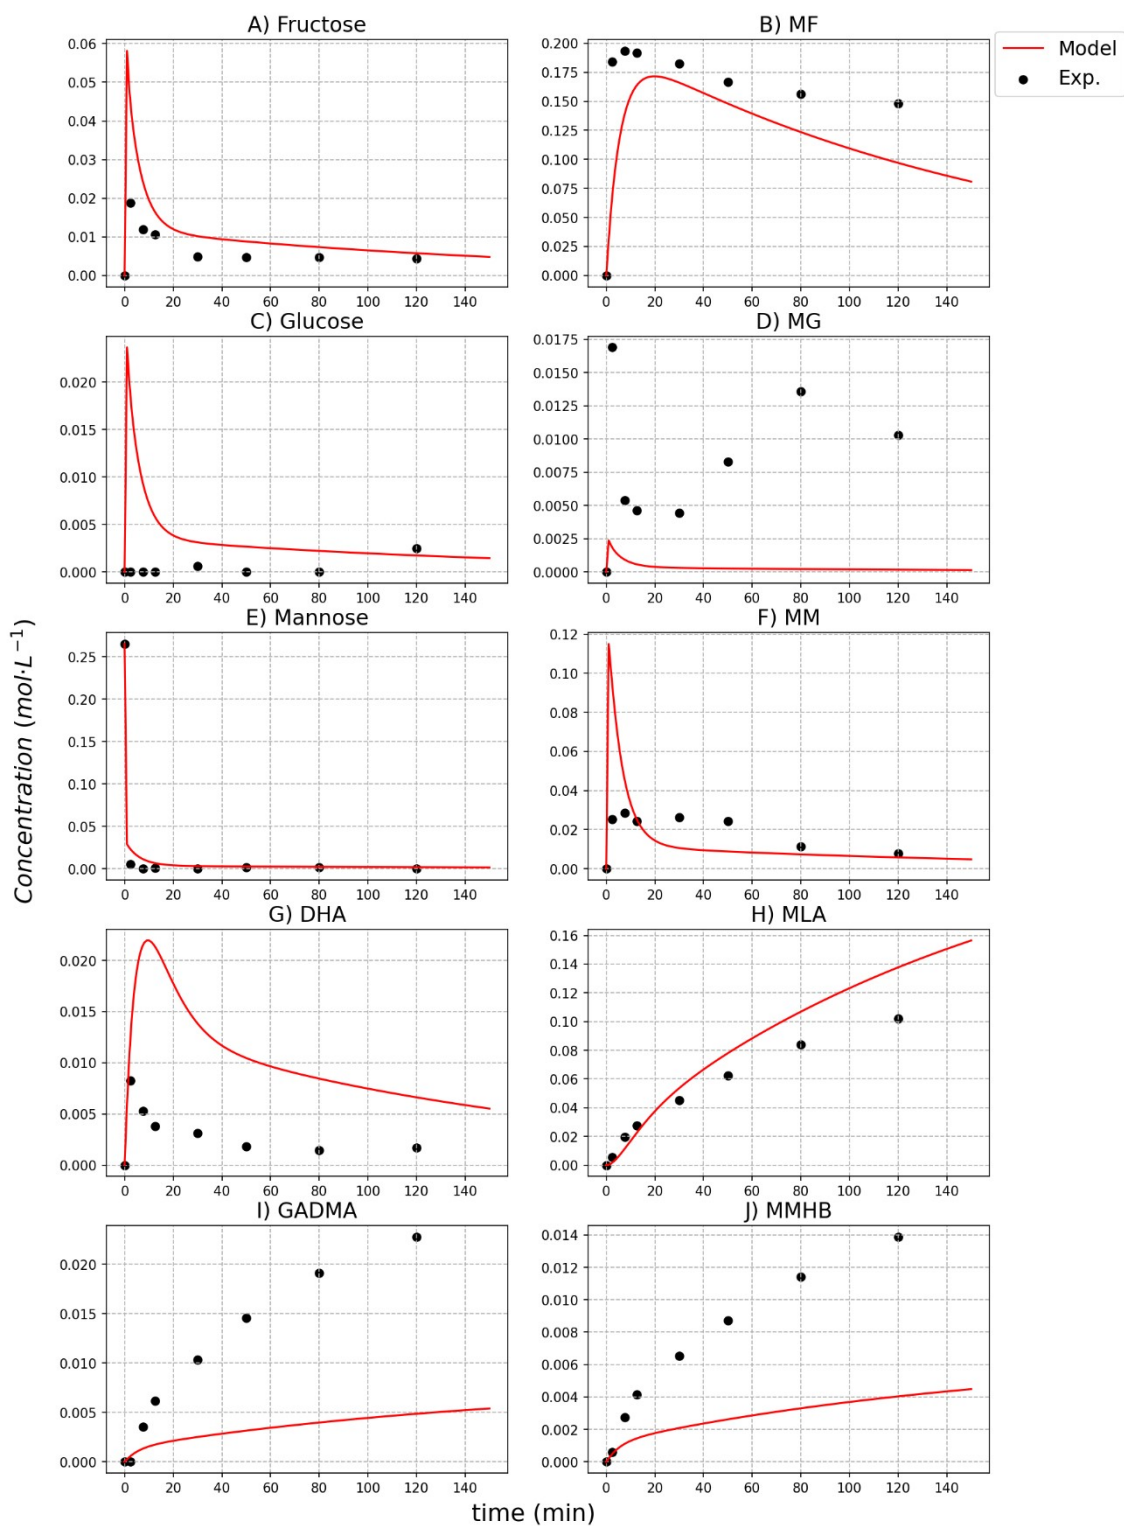

**Figure S-11.** Validation of the kinetic model at 140 °C when mannose is fed as substrate. The concentration is presented for the following components: A) Fructose, B) MFP, C) Glucose, D) MGP, E) Mannose, F) MMP, G) DHA, H) MLa, I) GADMA and J) MMHB.

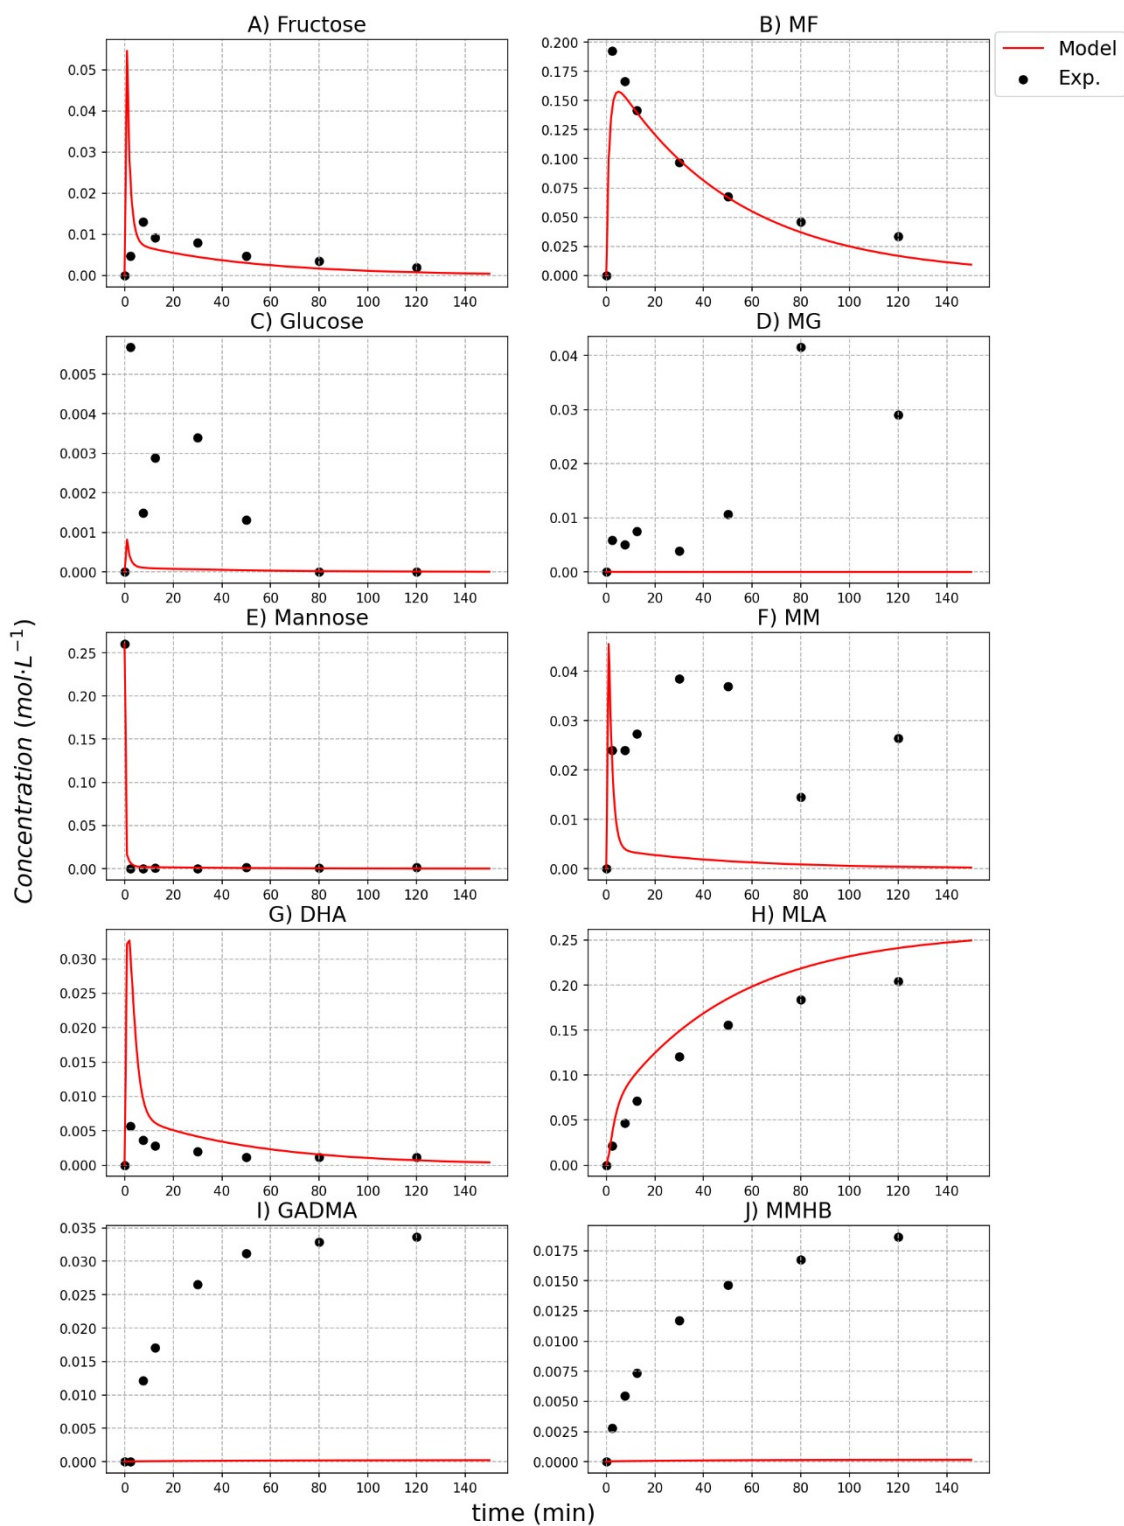

**Figure S-12.** Validation of the kinetic model at 160 °C when mannose is fed as substrate. The concentration is presented for the following components: A) Fructose, B) MFP, C) Glucose, D) MGP, E) Mannose, F) MMP, G) DHA, H) MLa, I) GADMA and J) MMHB.

**S-4: Validation of the model for case studies with different catalyst load with glucose as substrate at 140 °C.**

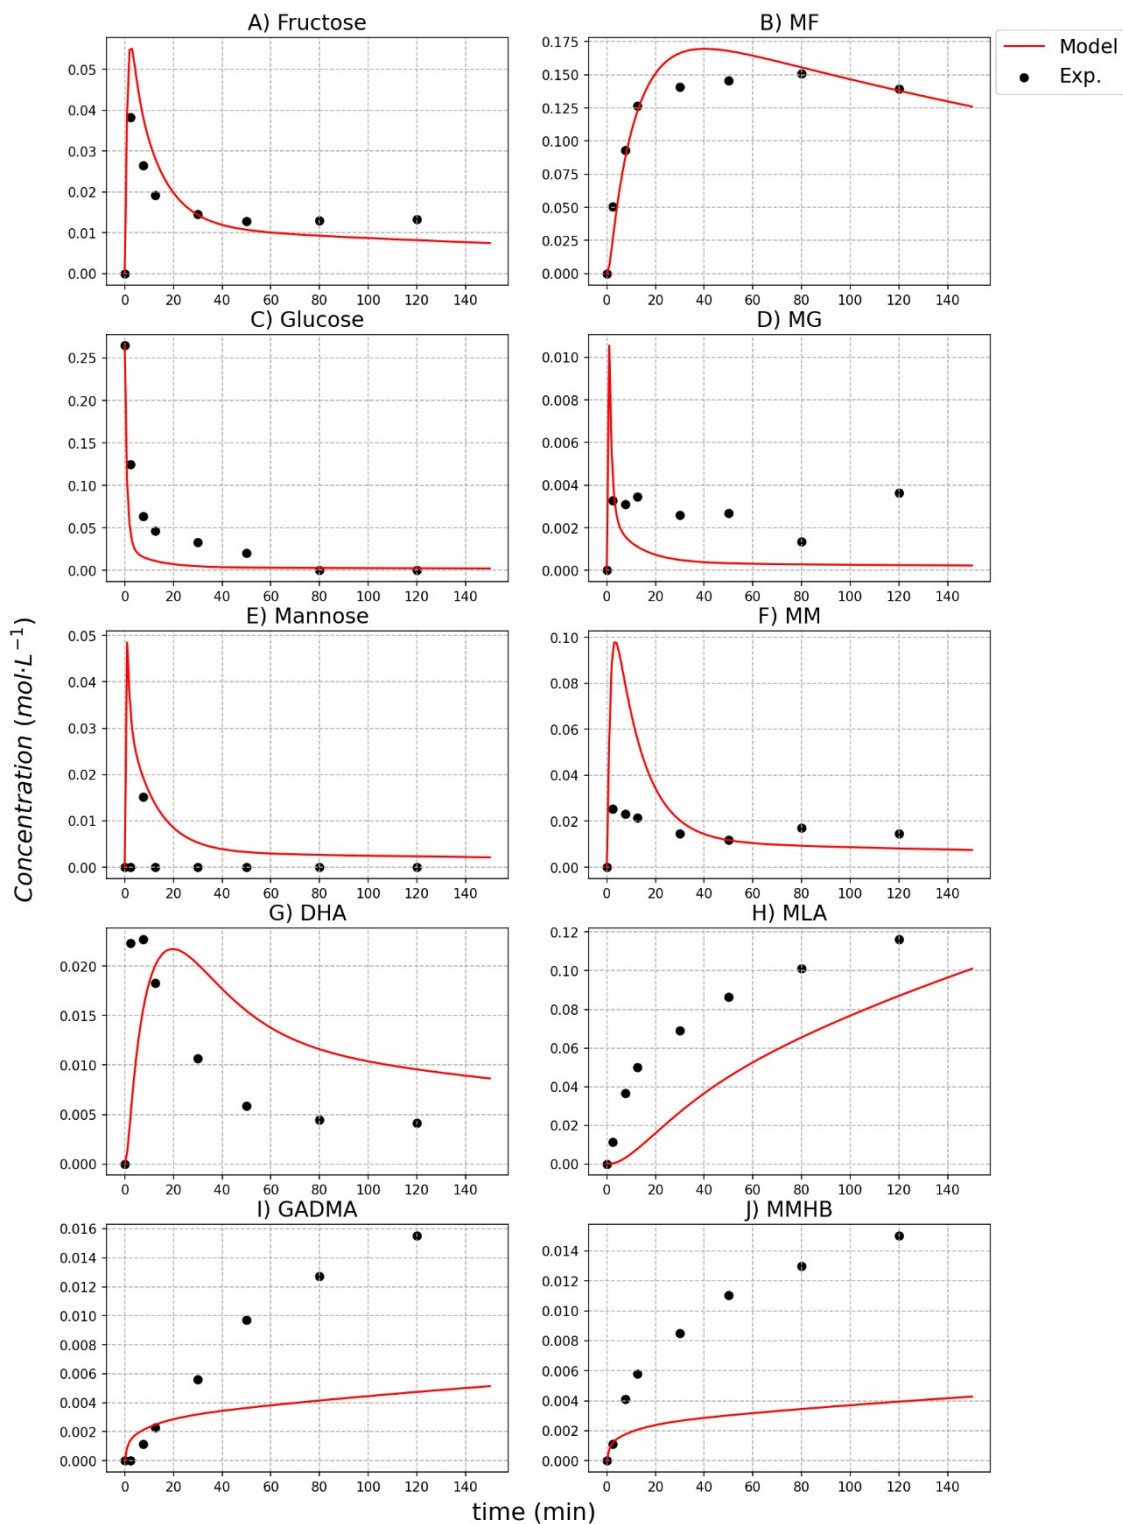

**Figure S-13.** Validation of the kinetic model at 140 °C when glucose is fed as substrate with a catalyst load of 5 g/L. The concentration is presented for the following components: A) Fructose, B) MFP, C) Glucose, D) MGP, E) Mannose, F) MMP, G) DHA, H) MLa, I) GADMA and J) MMHB.

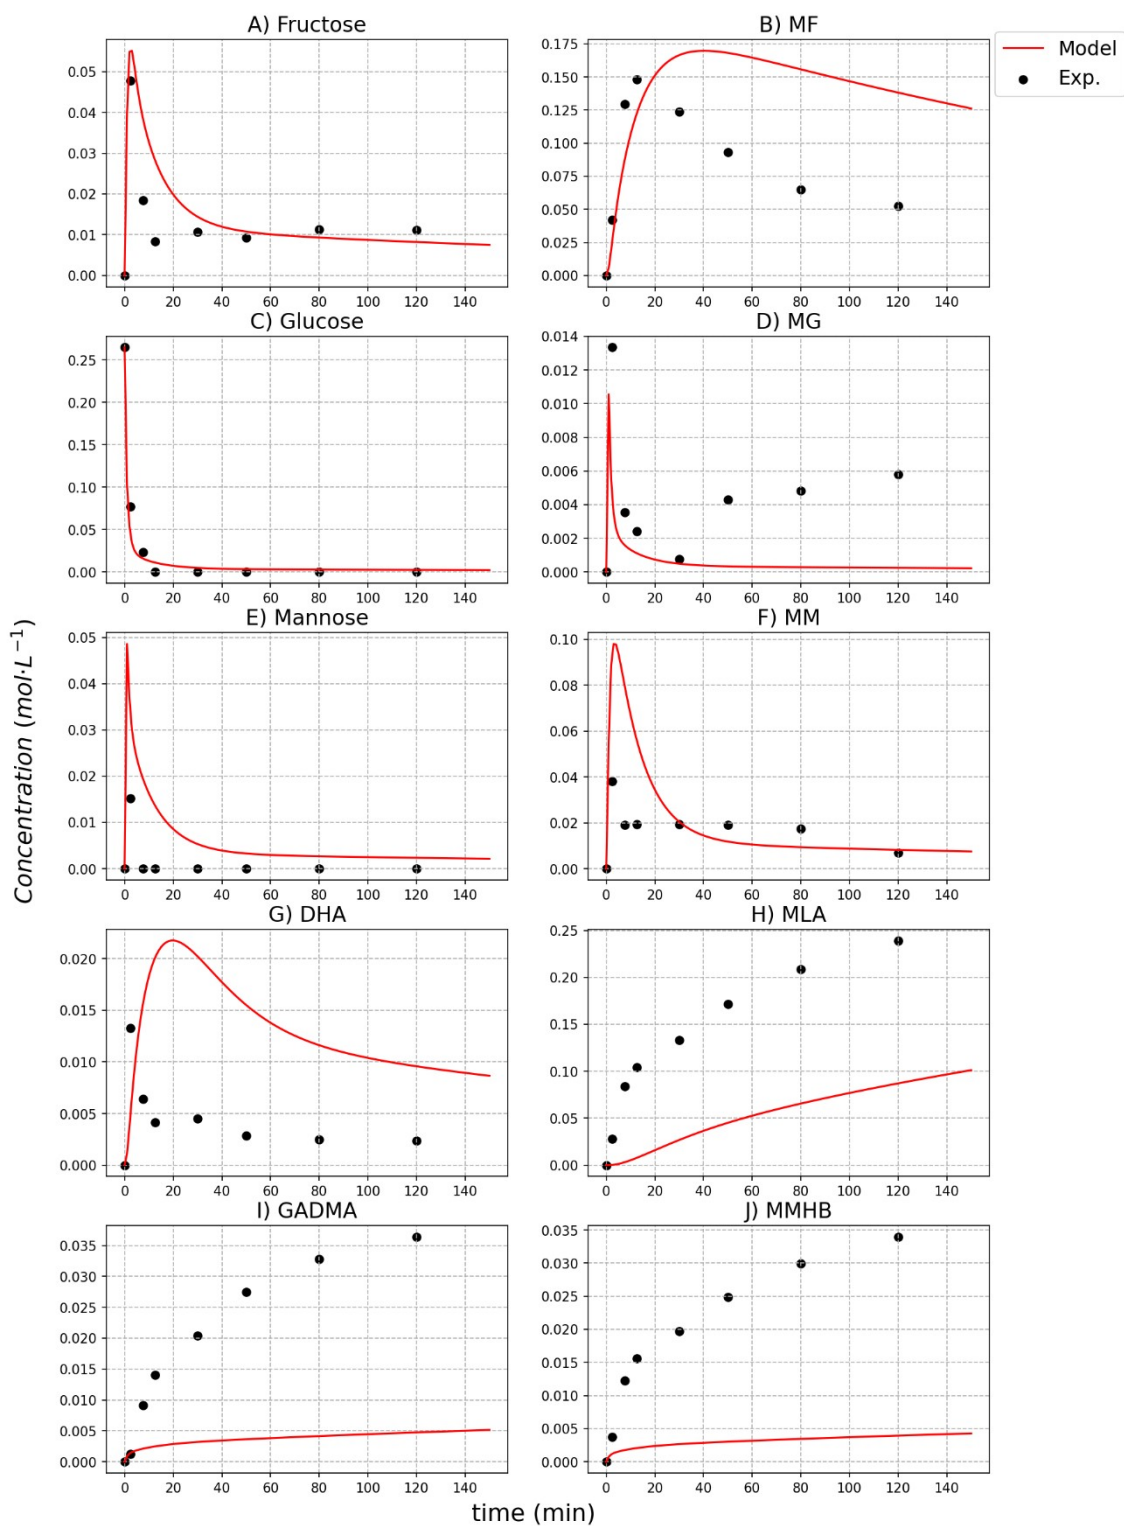

**Figure S-14.** Validation of the kinetic model at 140 °C when glucose is fed as substrate with a catalyst load of 20 g/L. The concentration is presented for the following components: A) Fructose, B) MFP, C) Glucose, D) MGP, E) Mannose, F) MMP, G) DHA, H) MLa, I) GADMA and J) MMHB.

**S-5: Validation of the model for case studies with different catalyst load with fructose as substrate at 140 °C.**

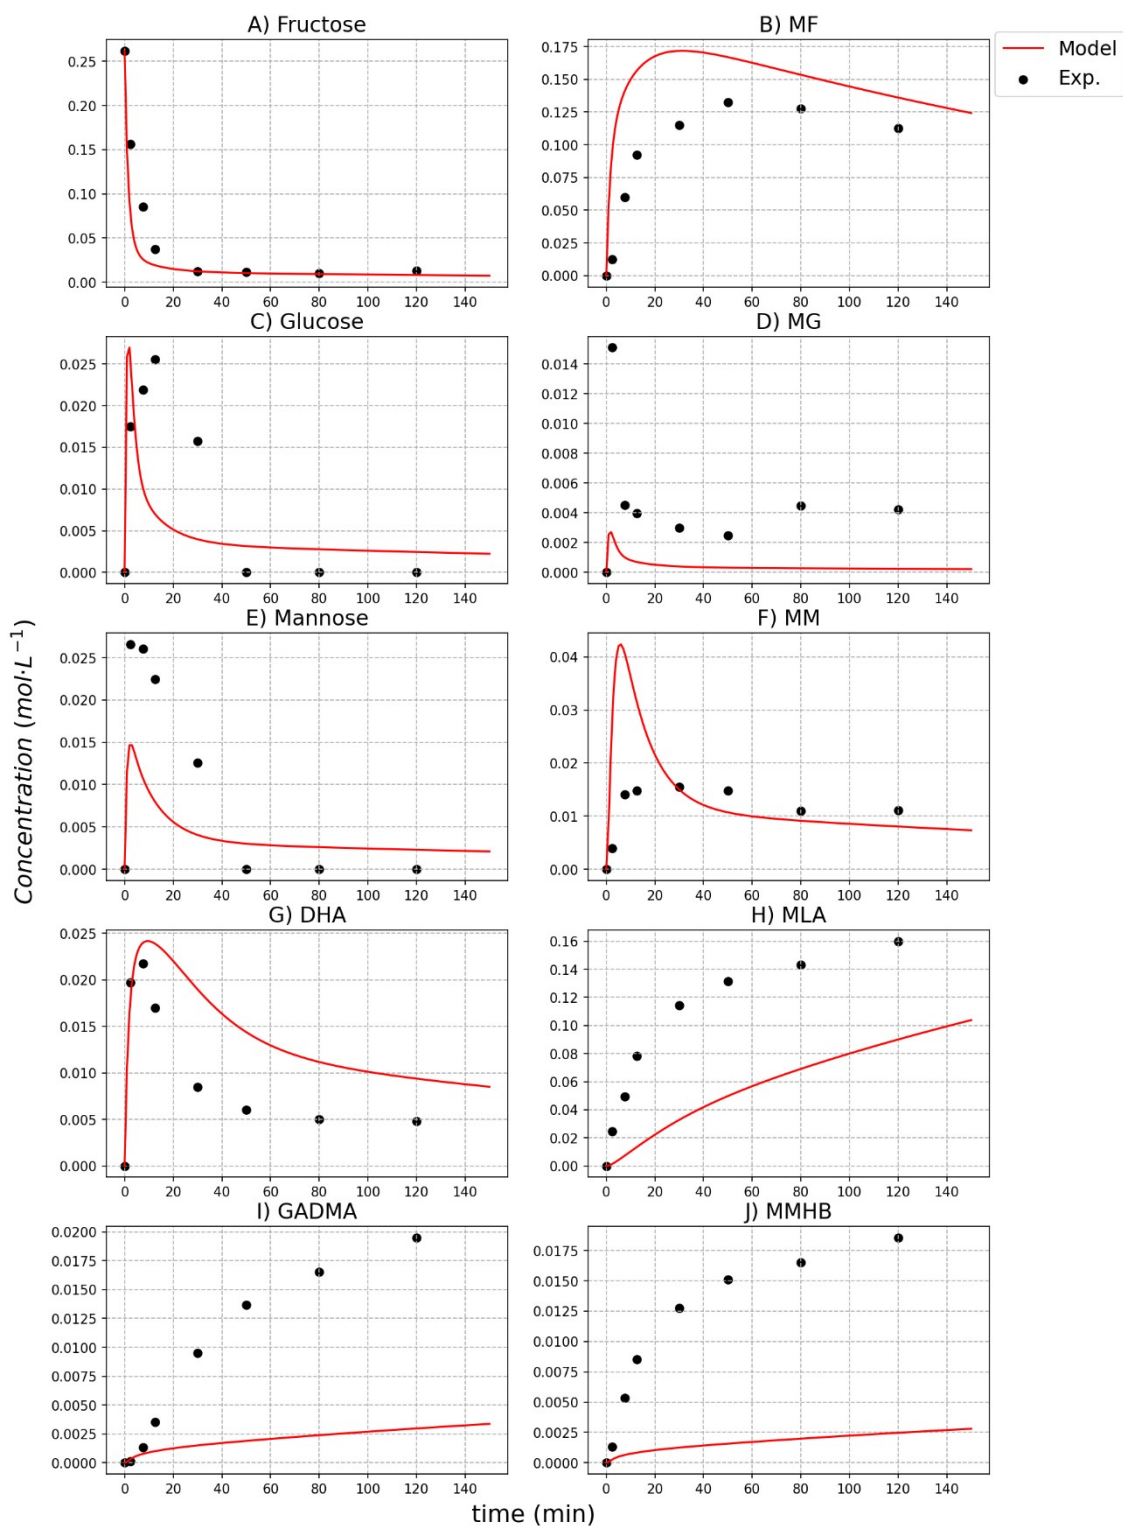

**Figure S-15.** Validation of the kinetic model at 140 °C when fructose is fed as substrate with a catalyst load of 5 g/L. The concentration is presented for the following components: A) Fructose, B) MFP, C) Glucose, D) MGP, E) Mannose, F) MMP, G) DHA, H) MLa, I) GADMA and J) MMHB.



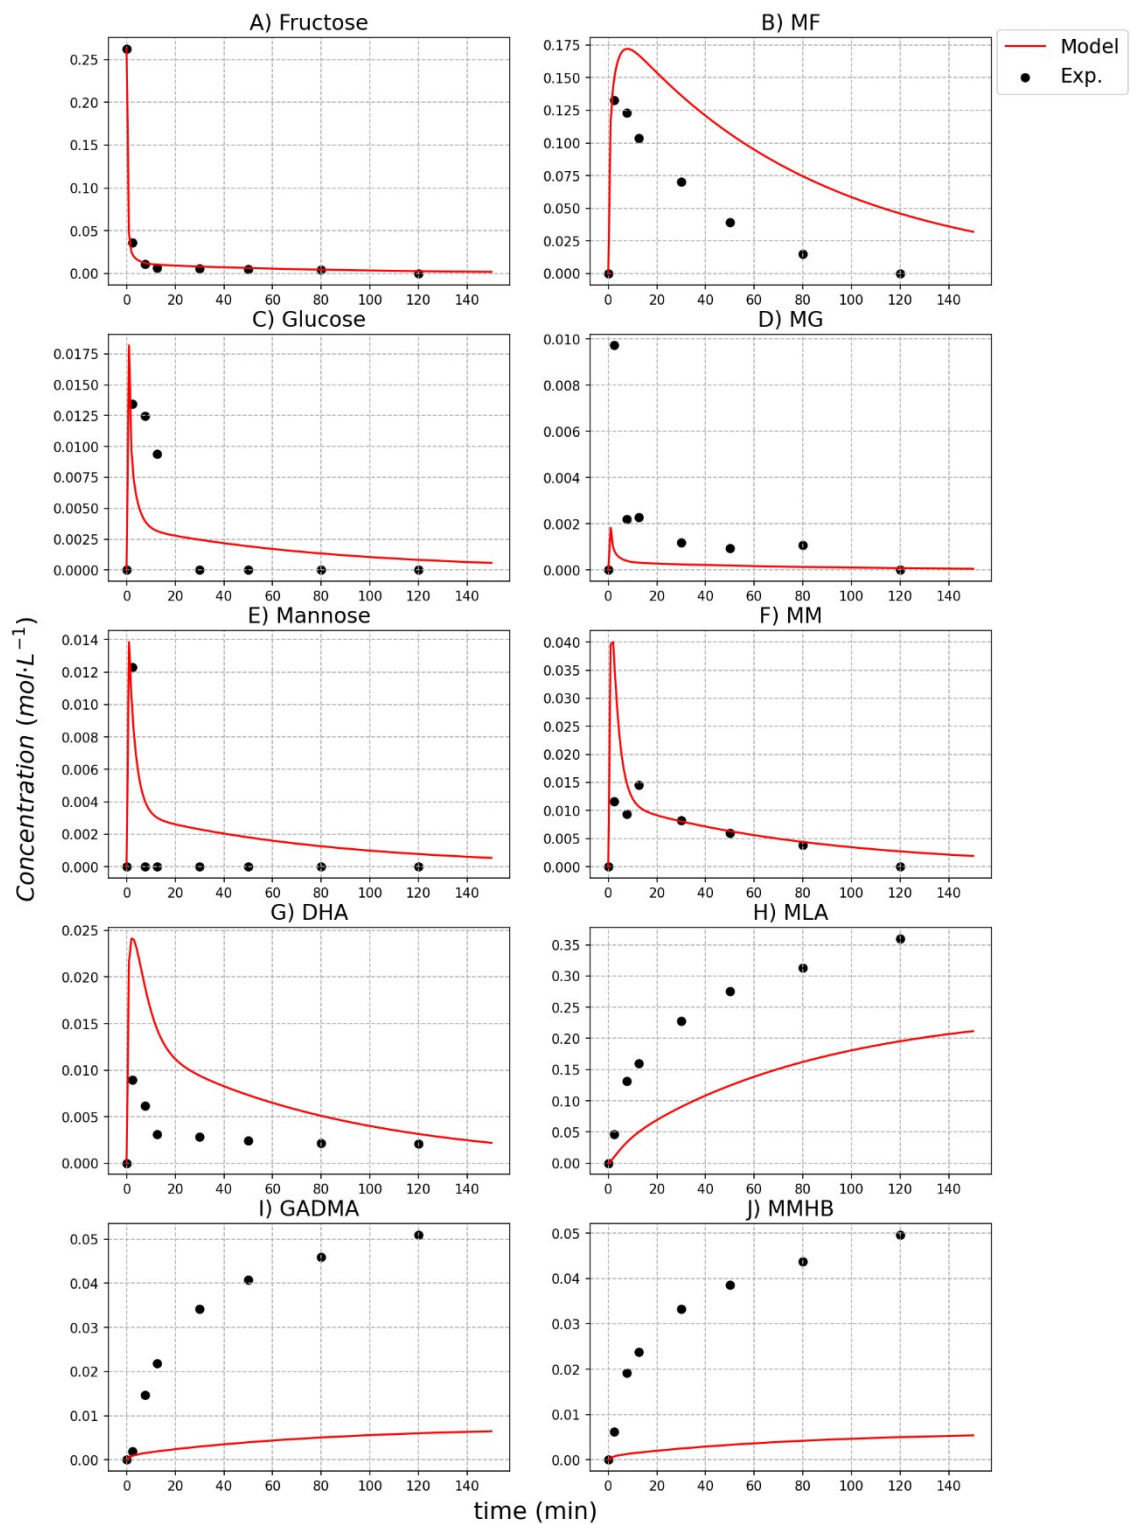

**Figure S-16.** Validation of the kinetic model at 140 °C when fructose is fed as substrate with a catalyst load of 20 g/L. The concentration is presented for the following components: A) Fructose, B) MFP, C) Glucose, D) MGP, E) Mannose, F) MMP, G) DHA, H) MLa, I) GADMA and J) MMHB.

**S-6: Validation of the model for case studies with different catalyst load with mannose as substrate at 140 °C.**

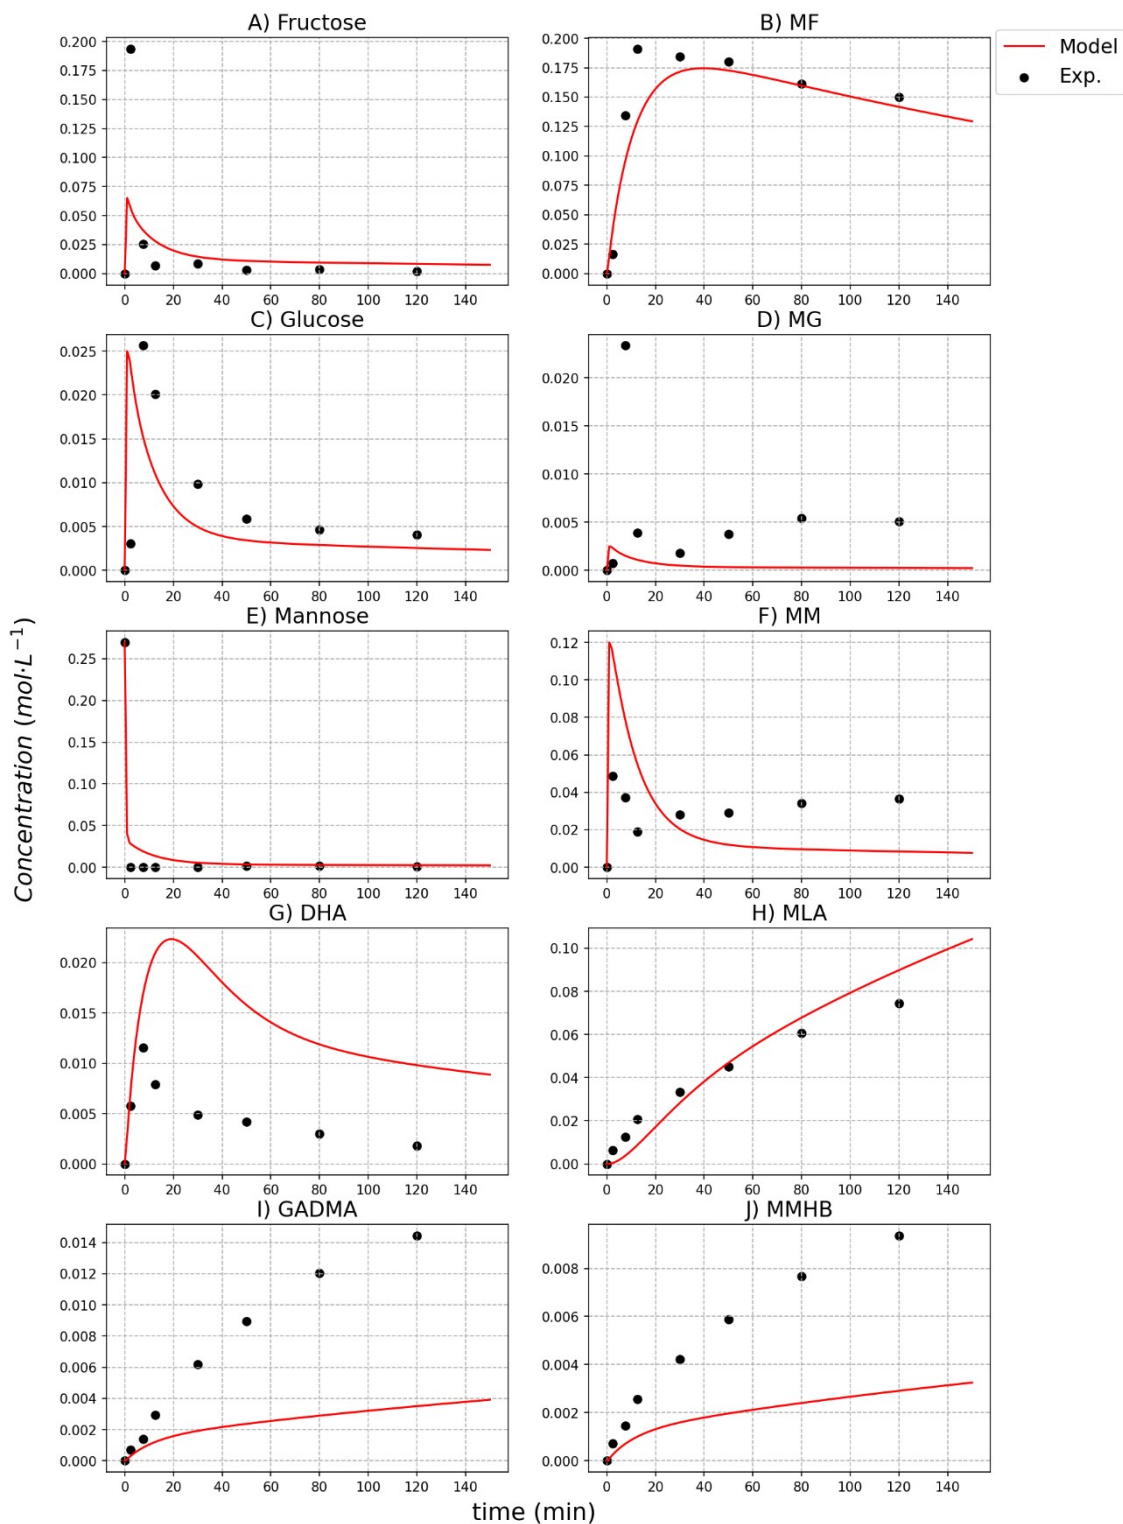

**Figure S-17.** Validation of the kinetic model at 140 °C when mannose is fed as substrate with a catalyst load of 5 g/L. The concentration is presented for the following components: A) Fructose, B) MFP, C) Glucose, D) MGP, E) Mannose, F) MMP, G) DHA, H) MLa, I) GADMA and J) MMHB.

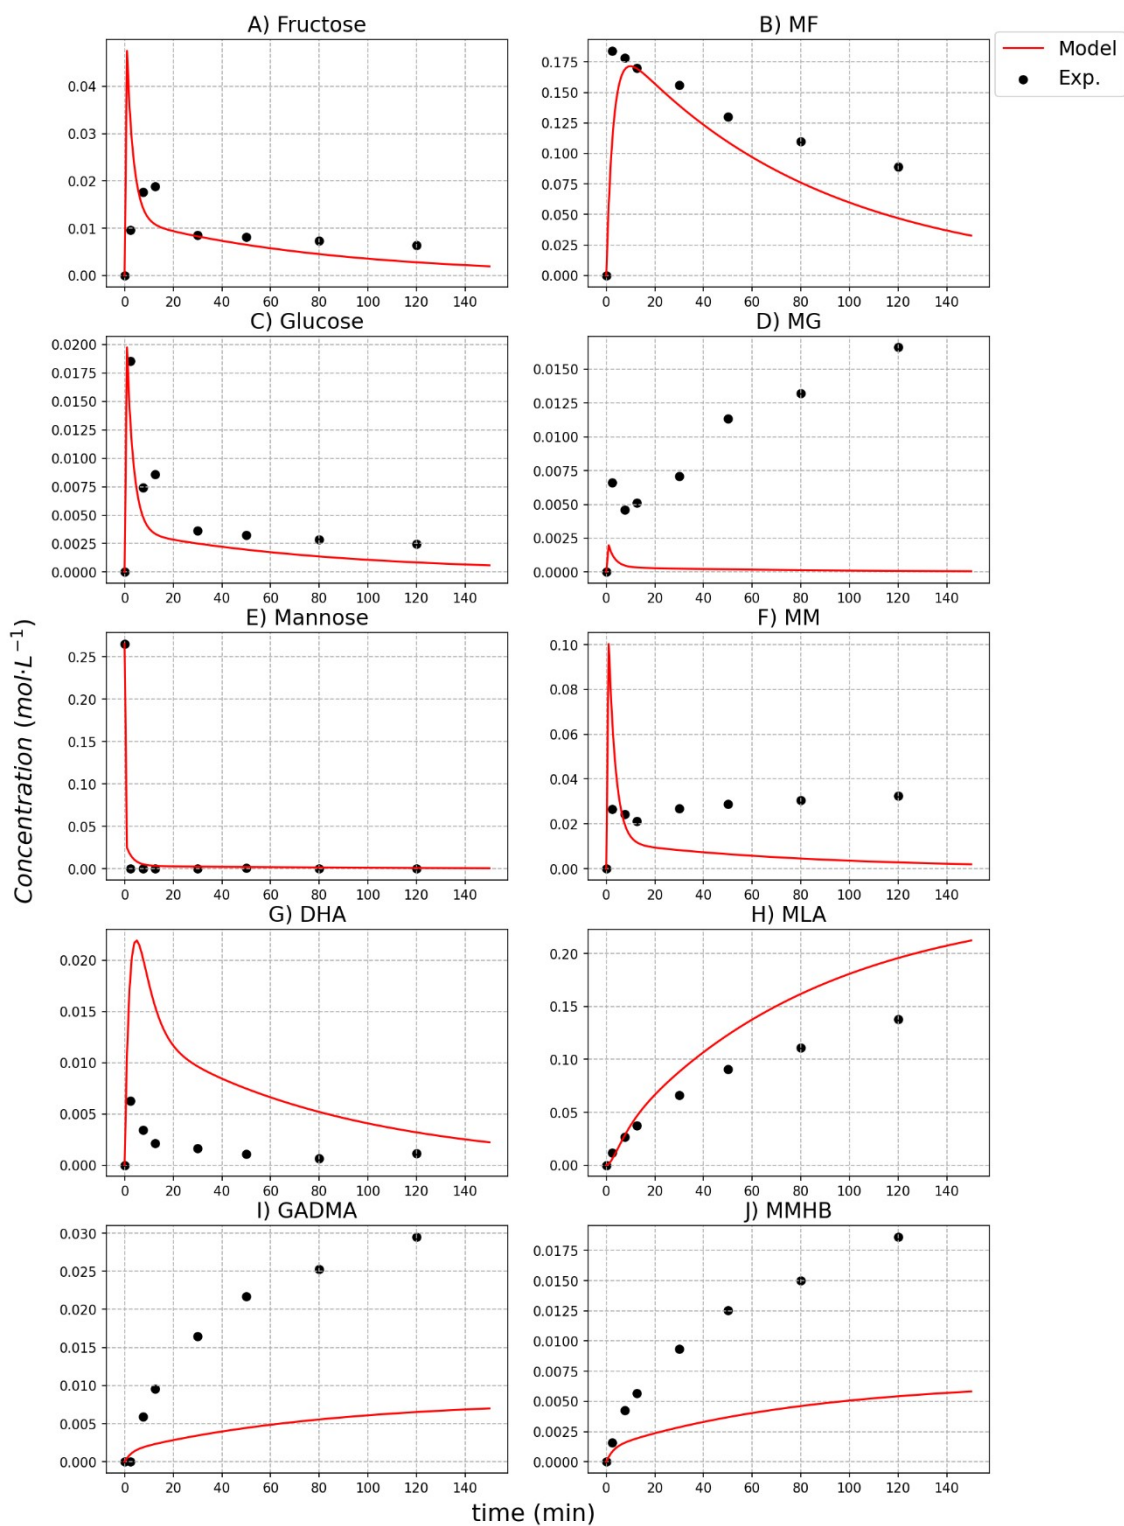

**Figure S-18.** Validation of the kinetic model at 140 °C when mannose is fed as substrate with a catalyst load of 20 g/L. The concentration is presented for the following components: A) Fructose, B) MFP, C) Glucose, D) MGP, E) Mannose, F) MMP, G) DHA, H) MLa, I) GADMA and J) MMHB.
